# Supplementary material for: Smart Home Technology Solutions for Cardiovascular Diseases: A Systematic Review
Source: MDPI journal article supplement (doi:10.3390/asi5030051), 2022-05-27
Supplement: s1 [file s1]

# Supplementary Materials: Smart Home Technology Solutions for Cardiovascular Diseases: A Systematic Review

Jeban Chandir Moses <sup>1</sup>, Sasan Adibi <sup>1</sup>, Maia Angelova <sup>1</sup> and Sheikh Mohammed Shariful Islam <sup>2,\*</sup>

<sup>1</sup> School of Information Technology, Deakin University, Burwood, VIC 3125, Australia; jcmoses@deakin.edu.au (J.C.M.); sasan.adibi@deakin.edu.au (S.A.); maia.a@deakin.edu.au (M.A.)

<sup>2</sup> Institute for Physical Activity and Nutrition (IPAN), Deakin University, Burwood, VIC 3125, Australia

\* Correspondence: shariful.islam@deakin.edu.au; Tel.: +61-3-924-68393

**Table S1.** Web of Science search strategy.

| # | Searches                                                                                                         | Results    |
|---|------------------------------------------------------------------------------------------------------------------|------------|
| 1 | "home based" OR "in house" OR home OR in-house OR house OR housing OR dwelling OR residence                      | 1,428,563  |
| 2 | Limit 1 to title                                                                                                 | 399,872    |
| 3 | "cardiovascular disease" OR CVD OR heart OR cardiac OR "coronary heart disease" OR myocardial OR "heart failure" | 3,917,487  |
| 4 | Limit 3 to title                                                                                                 | 1,284,173  |
| 5 | technology OR computer OR tablet OR "mobile phone" OR smartphone OR internet OR "information technology" OR IT   | 22,096,267 |
| 6 | 2 AND 4 AND 5                                                                                                    | 657        |
| 7 | Limit 6 to publication years between 1990 and March 2020                                                         | 562        |
| 8 | Limit 7 to language English                                                                                      | 559        |
